# Supplementary material
Source: HighWire-hosted journal article supplement (http://bmjopenquality.bmj.com/highwire/filestream/145930/field_highwire_adjunct_files/4/bmjoq-2022-002035supp005_data_supplement.pdf)
Supplement: bmjoq-2022-002035supp005_data_supplement.pdf [file bmjoq-2022-002035supp005_data_supplement.pdf]

**MEDICIN OG ÆNDRINGER**

|                                    | Dato |
|------------------------------------|------|------|------|------|------|------|------|------|------|
| Medicin inkl. dosis                |      |      |      |      |      |      |      |      |      |
| Pyridoxin<br>(B6)                  |      |      |      |      |      |      |      |      |      |
| Antihistamin<br>(postafen/marzine) |      |      |      |      |      |      |      |      |      |
| Metoclopramid                      |      |      |      |      |      |      |      |      |      |
| Ondansetron                        |      |      |      |      |      |      |      |      |      |
| Andet                              |      |      |      |      |      |      |      |      |      |
|                                    |      |      |      |      |      |      |      |      |      |
